# Supplementary material for: Blood-Brain Barrier Opening in Primary Brain Tumors with Non-invasive MR-Guided Focused Ultrasound: A Clinical Safety and Feasibility Study
Source: PubMed Central journal article supplement (PMC6344541; doi:10.1038/s41598-018-36340-0), 2019-01-23
Supplement: 41598_2018_36340_MOESM1_ESM.pdf [file 41598_2018_36340_MOESM1_ESM.pdf]

**Supplementary Information**

**Blood-Brain Barrier Opening in Primary Brain Tumors with Non-invasive MR-Guided Focused  
Ultrasound: A Clinical Safety and Feasibility Study**

**Todd Mainprize, Nir Lipsman, Yuexi Huang, Ying Meng, Allison Bethune, Sarah Ironside, Chinthaka  
Heyn, Ryan Alkins, Maureen Trudeau, Arjun Sahgal, James Perry, Kullervo Hynynen**

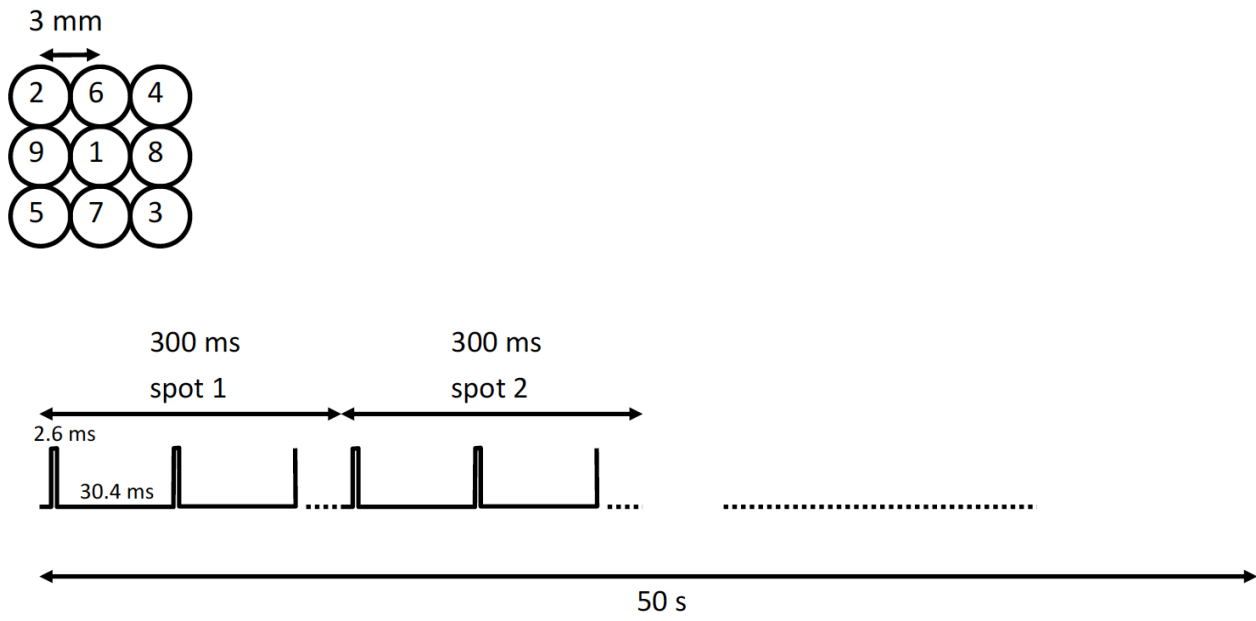

Figure S1.

Sonication grid: spatial and temporal representation of each of nine targeted ultrasound spots within a sonication grid.

| Patient        | No. of Targets | Grid Dimensions <sup>a</sup> (cm <sup>3</sup> ) | Range of Actual Sonication Power (Watts) | Maximal Sonication Duration (Seconds) |
|----------------|----------------|-------------------------------------------------|------------------------------------------|---------------------------------------|
| 1              | 2              | 0.9 x 0.9 x 0.6                                 | 5-9                                      | 50 s repeated                         |
| 2              | 4              | 0.9 x 0.9 x 0.6                                 | 6-7.5                                    | 50 s repeated                         |
| 3              | 5              | 0.9 x 0.9 x 0.6                                 | 8-10                                     | 50 s repeated                         |
| 4 <sup>b</sup> | 2              | 0.9 x 0.9 x 0.6                                 | 6-7.5                                    | 50 s repeated                         |
| 5              | 5              | 0.9 x 0.9 x 0.6                                 | 4-15                                     | 50 s repeated                         |

Table S1.

Sonication parameters

<sup>a</sup> Grid dimensions: (Anterior-Posterior x Medial-Lateral x Superior-Inferior).

<sup>b</sup> Patient aborted prior to central tumor sonication due to back pain
